# Supplementary material for: Hemin-micelles immobilized in alginate hydrogels as artificial enzymes with peroxidase-like activity and substrate selectivity
Source: Royal Society of Chemistry journal article supplement (doi:10.1039/c6bm00813e), 2017-01-01
Supplement: c6bm00813e1.pdf [file c6bm00813e1.pdf]

## Electronic supplementary information

### **Hemin-micelles immobilized in alginate hydrogels as artificial enzymes with peroxidase-like activity and substrate selectivity**

Rui Qu, Hejin Shi, Ruolin Wang, Tangjian Cheng, Rujiang Ma, Yingli An and Linqi Shi\*

State Key Laboratory of Medicinal Chemical Biology, Key Laboratory of Functional Polymer Materials, Ministry of Education, Institute of Polymer Chemistry, Collaborative Innovation Center of Chemical Science and Engineering (Tianjin), Nankai University, Tianjin, 300071, China.

## 1. Preparations of block copolymers

### 1.1. Preparation of the macroinitiator PEG-Br

The macroinitiator PEG<sub>114</sub>-Br was synthesized according to ref. 1. The typical procedure to prepare PEG<sub>114</sub>-Br was introduced as shown in Fig. S1a. PEG<sub>5k</sub> (5.0 g, 1 mmol) was dissolved in 60 mL toluene in a 100 mL three-neck flask. After azeotropic distillation of about 10 mL toluene at reduced pressure to remove traces of water, trimethylamine (210  $\mu$ L, 1.5 mmol) was added and the solution mixture was cooled down to 0 °C. Then 2-bromoisobutyryl bromide (185  $\mu$ L, 1.5 mmol) was added over 1 hour, and the reaction mixture was stirred overnight at room temperature in N<sub>2</sub> atmosphere. Most of the toluene was removed by rotary evaporation prior to precipitation into a 10-fold excess of cold ether. The crude polymer was dried under vacuum, then dissolved in water at pH 8-9, and then extracted with CH<sub>2</sub>Cl<sub>2</sub>. The organic layer was collected and dried over MgSO<sub>4</sub>, and the purified PEG<sub>114</sub>-Br was isolated after the evaporation of the solvents under vacuum. PEG<sub>114</sub>-Br was characterized by <sup>1</sup>H NMR (Fig. S2).

### 1.2. Preparation of the RAFT agent PEG-CTA

The preparation was shown in Fig. S1b. PEG<sub>114</sub>-Br (2.0 g, 0.4 mmol) was dissolved in 20 mL anhydrous tetrahydrofuran (THF) in a 50 mL flask. Potassium ethylxanthate (715 mg, 4 mmol) was added to the solution mixture, and the reaction mixture was stirred for 48 hours at room temperature in N<sub>2</sub> atmosphere.<sup>2</sup> Most of the THF was removed by rotary evaporation, and the dried solid was dissolved in 50 mL CH<sub>2</sub>Cl<sub>2</sub>. The solution mixture was washed by 50 mL deionized water for three times to remove unreacted potassium ethylxanthate. The organic layer was collected and dried over MgSO<sub>4</sub>, and the purified PEG<sub>114</sub>-CTA was isolated after the evaporation of the solvents under vacuum. PEG<sub>114</sub>-CTA was characterized by <sup>1</sup>H NMR (Fig. S3).

### 1.3. Preparation of the block copolymer PEG<sub>114</sub>-*b*-PVIm<sub>15</sub>

The preparation was shown in Fig. S1c. PEG<sub>114</sub>-CTA (1.62 g, 0.3 mmol), AIBN (4.93 mg, 0.03 mmol) and 1-Vinylimidazole (2.70 mL, 30 mmol) were added into the reaction flask and then 10 mL of DMF was added. After three freeze-degas-thaw cycles, polymerization was conducted at 110 °C for 48 h. Most of the DMF was removed by rotary evaporation, and the mixture was diluted with CH<sub>2</sub>Cl<sub>2</sub>, and then precipitated into excess diethyl ether. The precipitate was dried under vacuum. PEG-*b*-PVIm was characterized by <sup>1</sup>H NMR (Fig. S4), the block number of PVIm was calculated to be 15. The PDI of the polymer was about 1.07 (GPC using DMF as eluent).

## 2. Supplementary figures

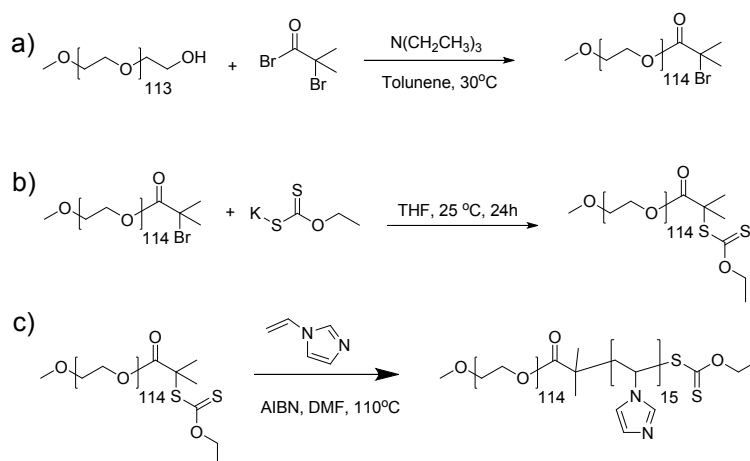

Fig. S1 Synthetic routes of (a) PEG-Br, (b) PEG-CTA and (c) PEG-*b*-PVIm.

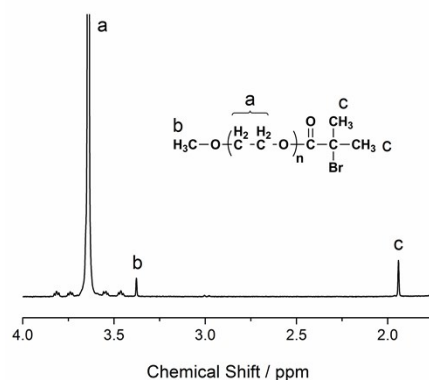

Fig.S2 <sup>1</sup>H NMR spectra of PEG-Br in CDCl<sub>3</sub>.

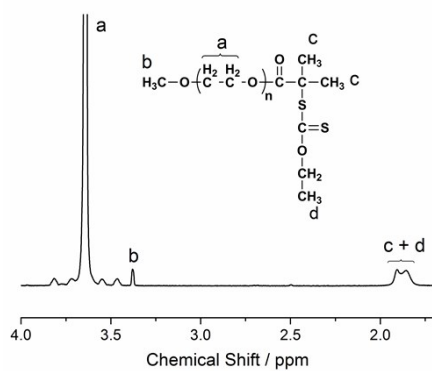

Fig. S3  $^1\text{H}$  NMR spectra of PEG-CTA in  $\text{CDCl}_3$ .

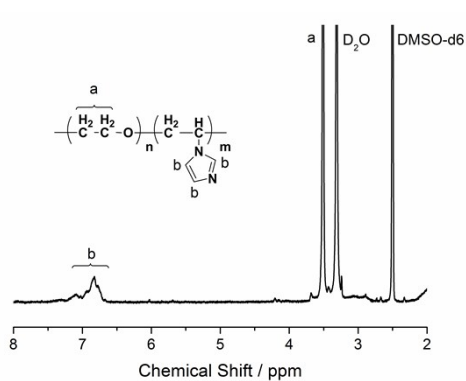

Fig. S4  $^1\text{H}$  NMR spectra of PEG-*b*-PVIm in  $\text{DMSO-d}_6$ .

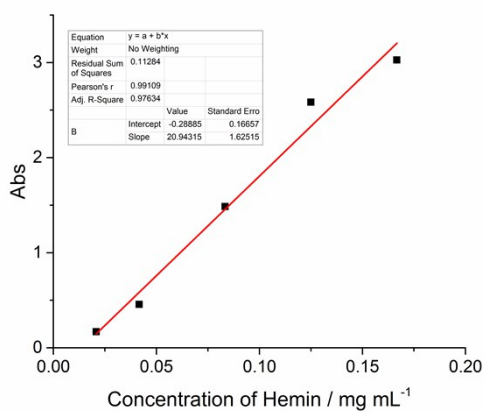

Fig. S5 The standard curve of PEG-*b*-PVIm/Hemin complex micelles.

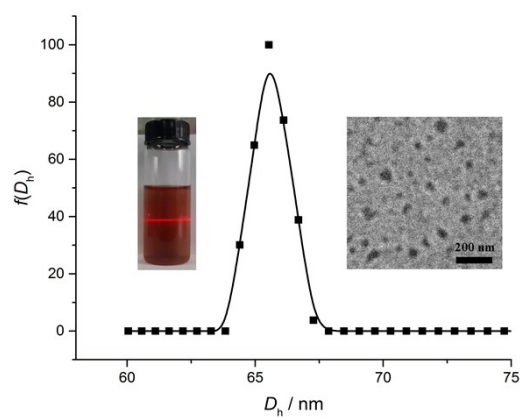

Fig. S6 Hydrodynamic diameter distribution of the hemin micelle in aqueous solution. Inset: the photograph (left) and TEM image (right, scale bar: 100 nm) of the micelle. Laser light (inset, left) was obtained by using a simple laser generator (650 nm, 5 mW).

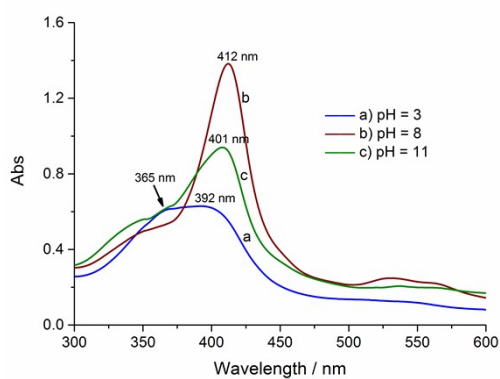

Fig. S7 The UV-vis spectra of the hemin micelles at different pHs.

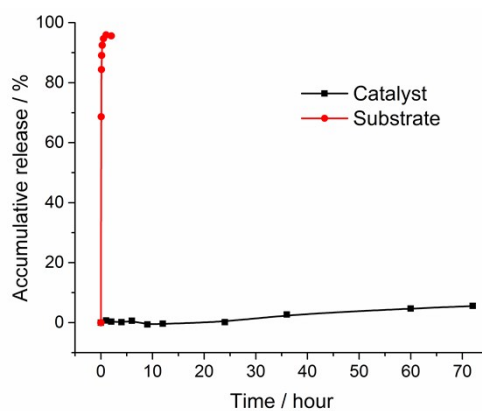

Fig. S8 Accumulative releases of the HM (catalyst) and Orange II (substrate). The release was performed at 25 °C.

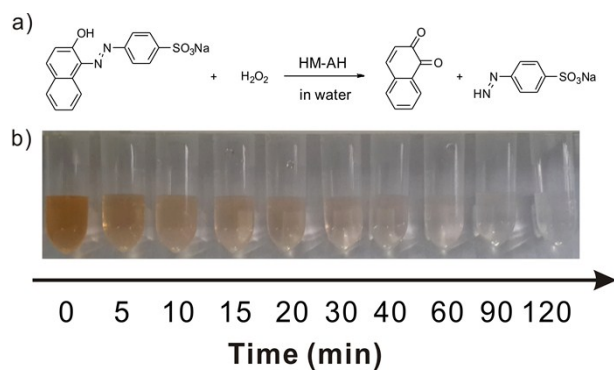

Fig. S9 (a) The peroxidized model reaction catalyzed by HM-AH in water. (b) Color changes of the substrates orange II in water along with the catalytic reactions.

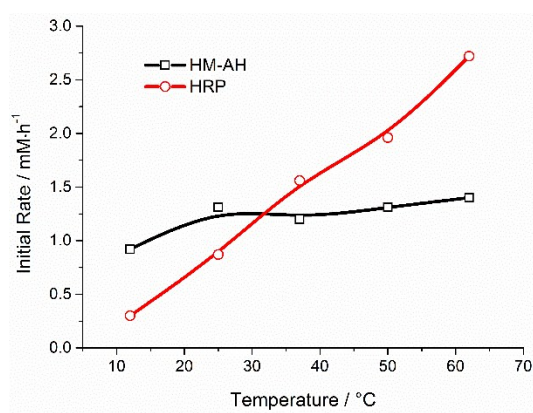

Fig. S10 Initial rates of the catalytic reactions catalyzed by HM-AH and HRP at different temperatures.

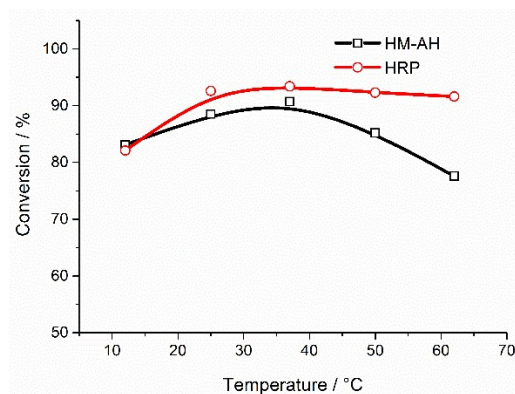

Fig. S11 Conversions of the catalytic reactions catalyzed by HM-AH and HRP at different temperatures.

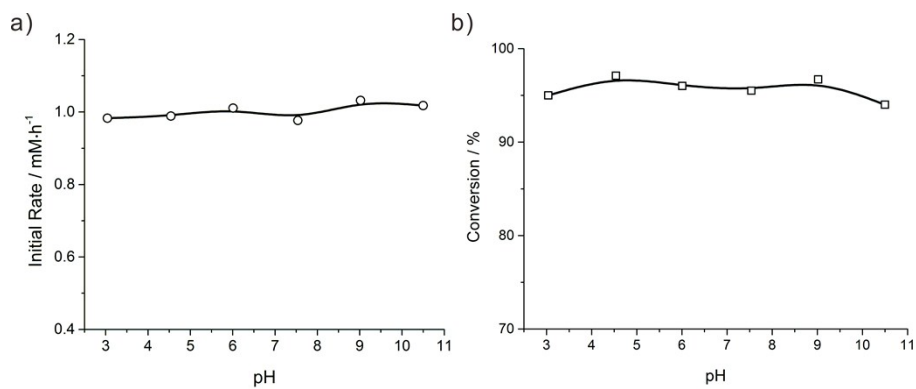

Fig S12. Initial rates (a) and conversions (b) of the catalytic reactions catalyzed by HM-AH at different pHs. 10 mM phosphate buffer was used to prepare the substrate solutions, and monovalent strong base or acid was used to adjust the pH.

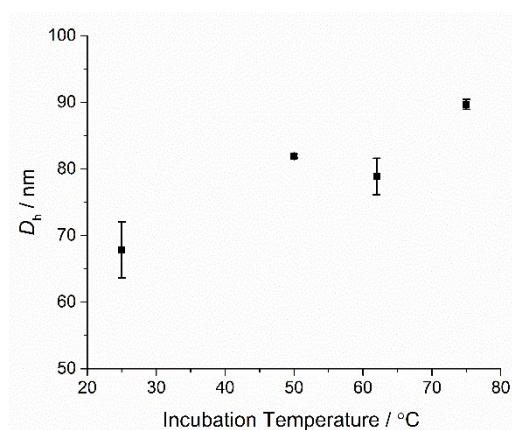

Fig. S13 The hydrodynamic diameters of hemin-micelles after incubation in aqueous media at different temperatures for one hour. The dynamic light scattering (DLS) was performed at 25 °C.

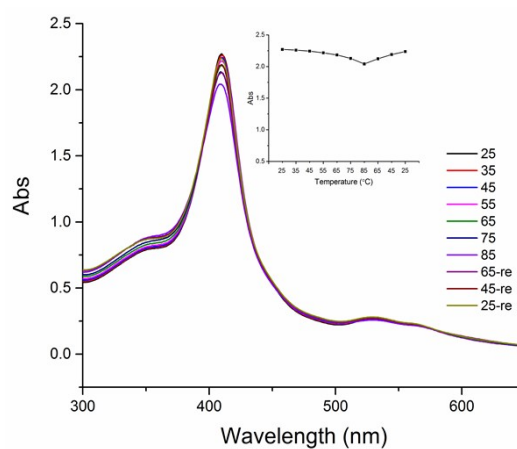

Fig. S14 UV-vis spectra of hemin-micelles during the heating-cooling process.

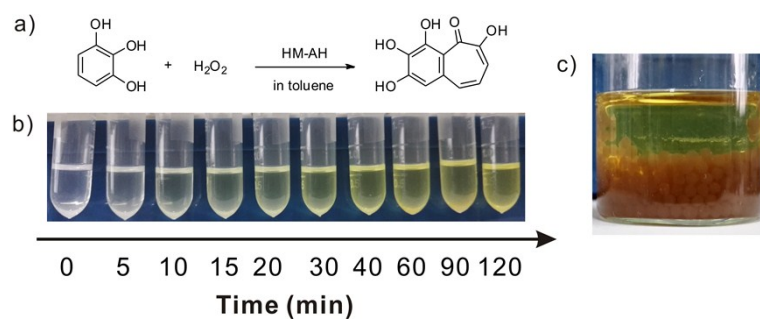

Fig. S15 (a) The peroxidized model reaction catalyzed by HM-AH in toluene. (b) Color changes of the substrates pyrogallol in toluene along with the catalytic reactions. (c) The optical image of HM-AH in toluene during the catalytic reaction.

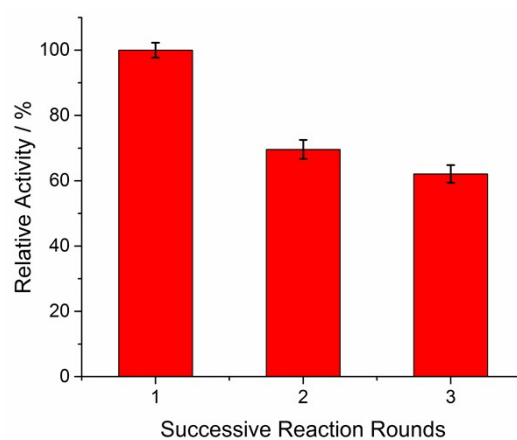

Fig. S16 The relative activity of the fresh and the recycled samples of orange II reaction in water with 15 minutes total conversion as the comparing index.

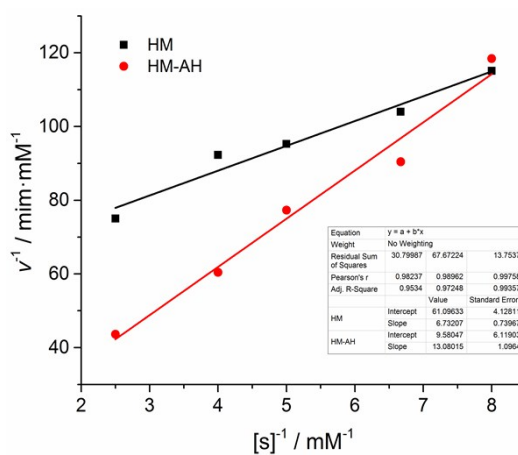

Fig. S17 The fitted curves of Lineweaver-Burk equation of HM and HM-AH at the fixed concentration of  $\text{H}_2\text{O}_2$  versus varying concentration of Orange II.



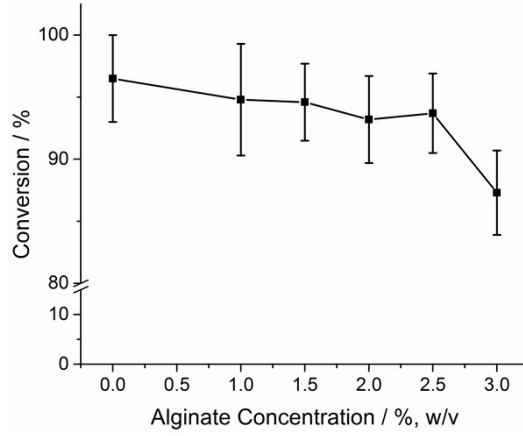

Fig. S18 Conversions of catalytic reactions by HM-AHs with different alginate concentrations.

### 3. Supplementary tables

Table S1 The comparison of the two block copolymers PEG-*b*-P4VP and PEG-*b*-PVI<sub>m</sub>.

|                                                               | M <sub>n</sub> | PDI <sup>a</sup> | M <sub>n</sub> (PEG)/M <sub>n</sub> |
|---------------------------------------------------------------|----------------|------------------|-------------------------------------|
| PEG <sub>45</sub> - <i>b</i> -P4VP <sub>145</sub>             | 17,225         | 1.07             | 0.12                                |
| PEG <sub>114</sub> - <i>b</i> -PVI <sub>m</sub> <sub>15</sub> | 6,410          | 1.07             | 0.78                                |

<sup>a</sup> PDIs of block copolymers were obtained by GPC.

Table S2 Summary of diffusion models based on obstruction theory<sup>4</sup>

| model expression                                                                                   | references                    |
|----------------------------------------------------------------------------------------------------|-------------------------------|
| $\frac{D_g}{D_0} = \exp\left[-\frac{(r_s + r_f)}{r_f}\right]\sqrt{\varphi}^a$                      | Ogston <sup>5</sup>           |
| $\frac{D_g}{D_0} = \exp(-0.84\alpha^{1.09})^b$                                                     | Johansson et al. <sup>6</sup> |
| $\frac{D_g}{D_0} = \left(1 + \frac{2}{3}\alpha\right)^{-1b}$                                       | Tsai et al. <sup>7</sup>      |
| $\frac{D_g}{D_0} = \exp\left[-\pi\left(\frac{r_s + r_f}{k_s\varphi^{1/2} + r_f}\right)^2\right]^c$ | Amsden <sup>8</sup>           |

<sup>a</sup>  $D_g$ , diffusion coefficient of the solute in a gel;  $D_0$ , diffusion coefficient of the solute in the liquid;  $r_s$ , the radius of the solute;  $r_f$ , the radius of the hydrogel fiber;  $\varphi$ , the volume fraction of polymer in the

gel. <sup>b</sup>  $\alpha = \varphi\left(\frac{r_s + r_f}{r_f}\right)^2$ . <sup>c</sup>  $k_s$ , constant for a given polymer-solvent system.

Table S3. Structures and property data of three polyphenols with different sizes.

|                                                   | GA                                                                                | EGCG                                                                              | TA                                                                                  |
|---------------------------------------------------|-----------------------------------------------------------------------------------|-----------------------------------------------------------------------------------|-------------------------------------------------------------------------------------|
| Full Name                                         | gallic acid                                                                       | (-)-epigallocatechin gallate                                                      | tannic acid                                                                         |
| Chemical Formula                                  | 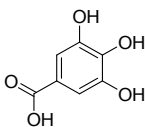 |  |  |
| $M_n$                                             | 170.12                                                                            | 458.37                                                                            | 1701.20                                                                             |
| Polar Surface Area <sup>a</sup> (Å <sup>2</sup> ) | 98                                                                                | 197                                                                               | 778                                                                                 |

<sup>a</sup> Data cited from ChemSpider. The property data were generated using the ACD/Labs Percepta Platform- PhysChem Module.

## References

- 1 X. Wang, L. Zhao, R. Ma, Y. An and L. Shi, *Chem. Commun.*, 2010, **46**, 6560-6562.
- 2 K. Kim, T. H. Kim, J. H. Choi, J. Y. Lee, S. S. Hah, H. Yoo, S. S. Hwang, K. N. Ryu, H. J. Kim and J. Kim, *Macromol. Chem. Phys.*, 2010, **211**, 1127-1136.
- 3 R. Qu, L. Shen, Z. Chai, C. Jing, Y. Zhang, Y. An and L. Shi, *ACS Appl. Mater. Interfaces*, 2014, **6**, 19207-19216.
- 4 B. Amsden, *Macromolecules*, 1998, **31**, 8382-8395.
- 5 A. G. Ogston, *Trans. Faraday Soc.*, 1958, **54**, 1754-1757.
- 6 L. Johansson, C. Elvingson and J. E. Lofroth, *Macromolecules*, 1991, **24**, 6024-6029.
- 7 D. S. Tsai and W. Strieder, *Chem. Eng. Commun.*, 1986, **40**, 207-218.
- 8 B. Amsden, *Polym. Gels Networks*, 1998, **6**, 13-43.
